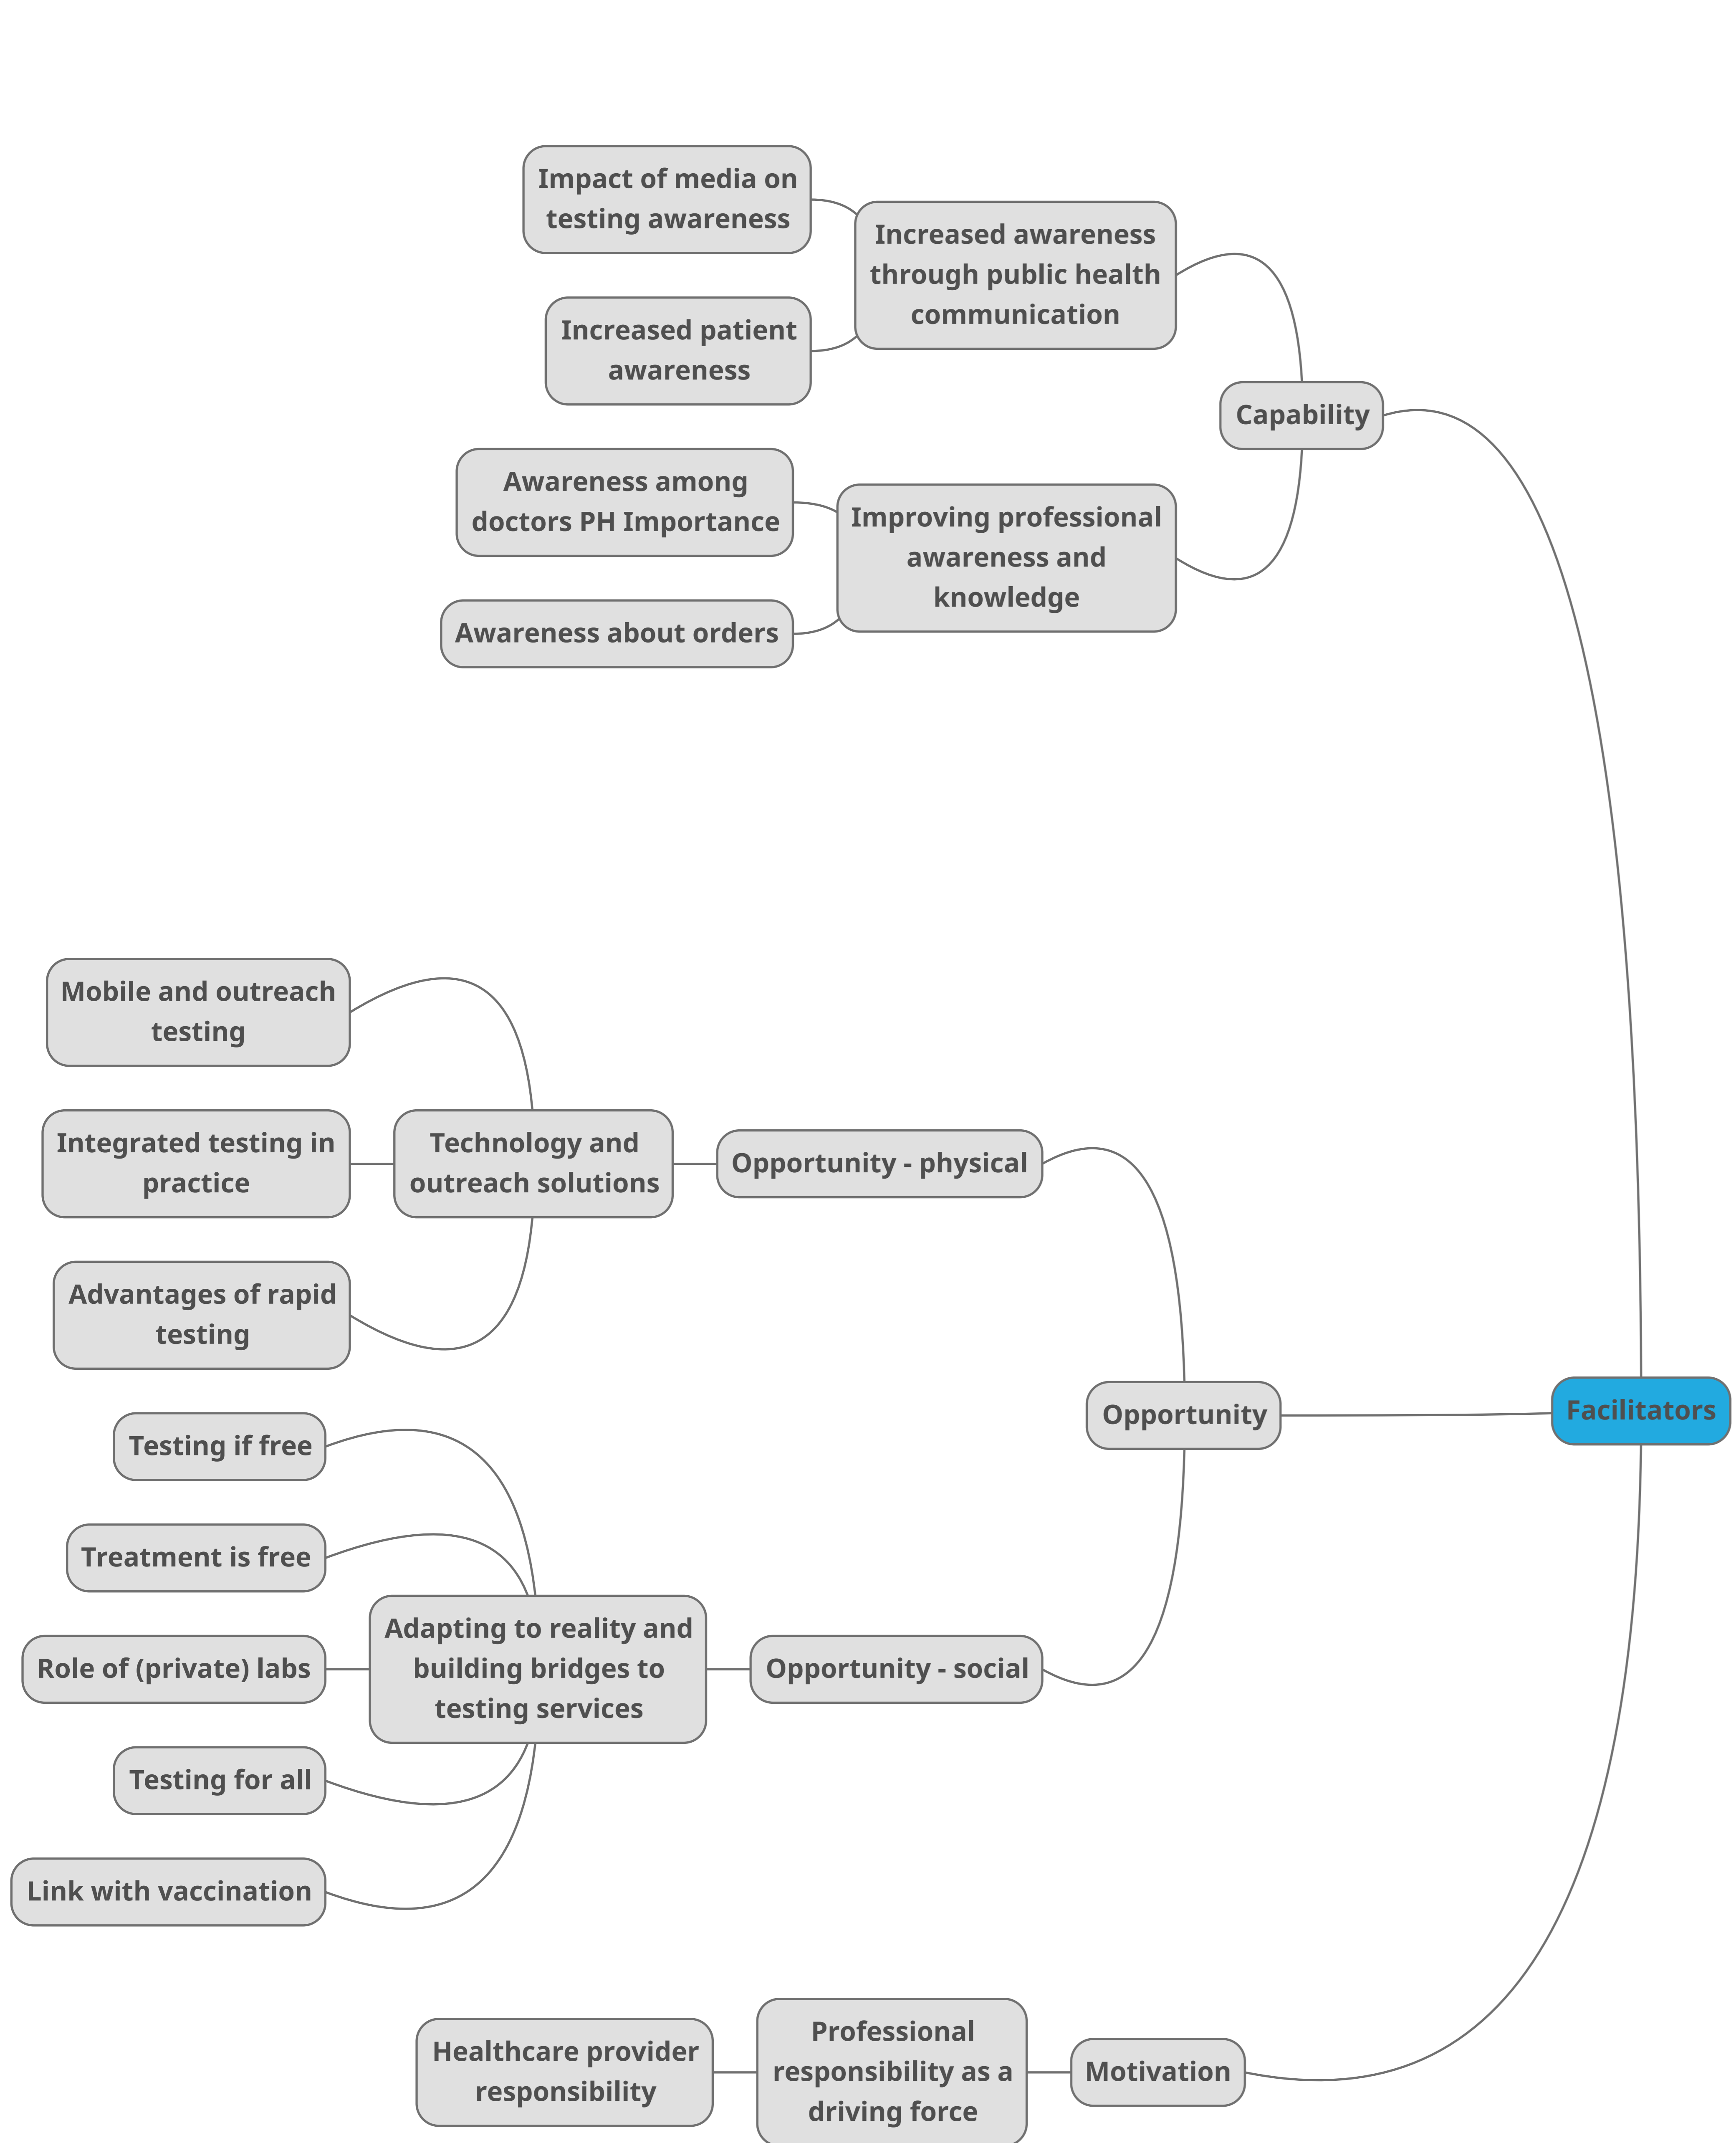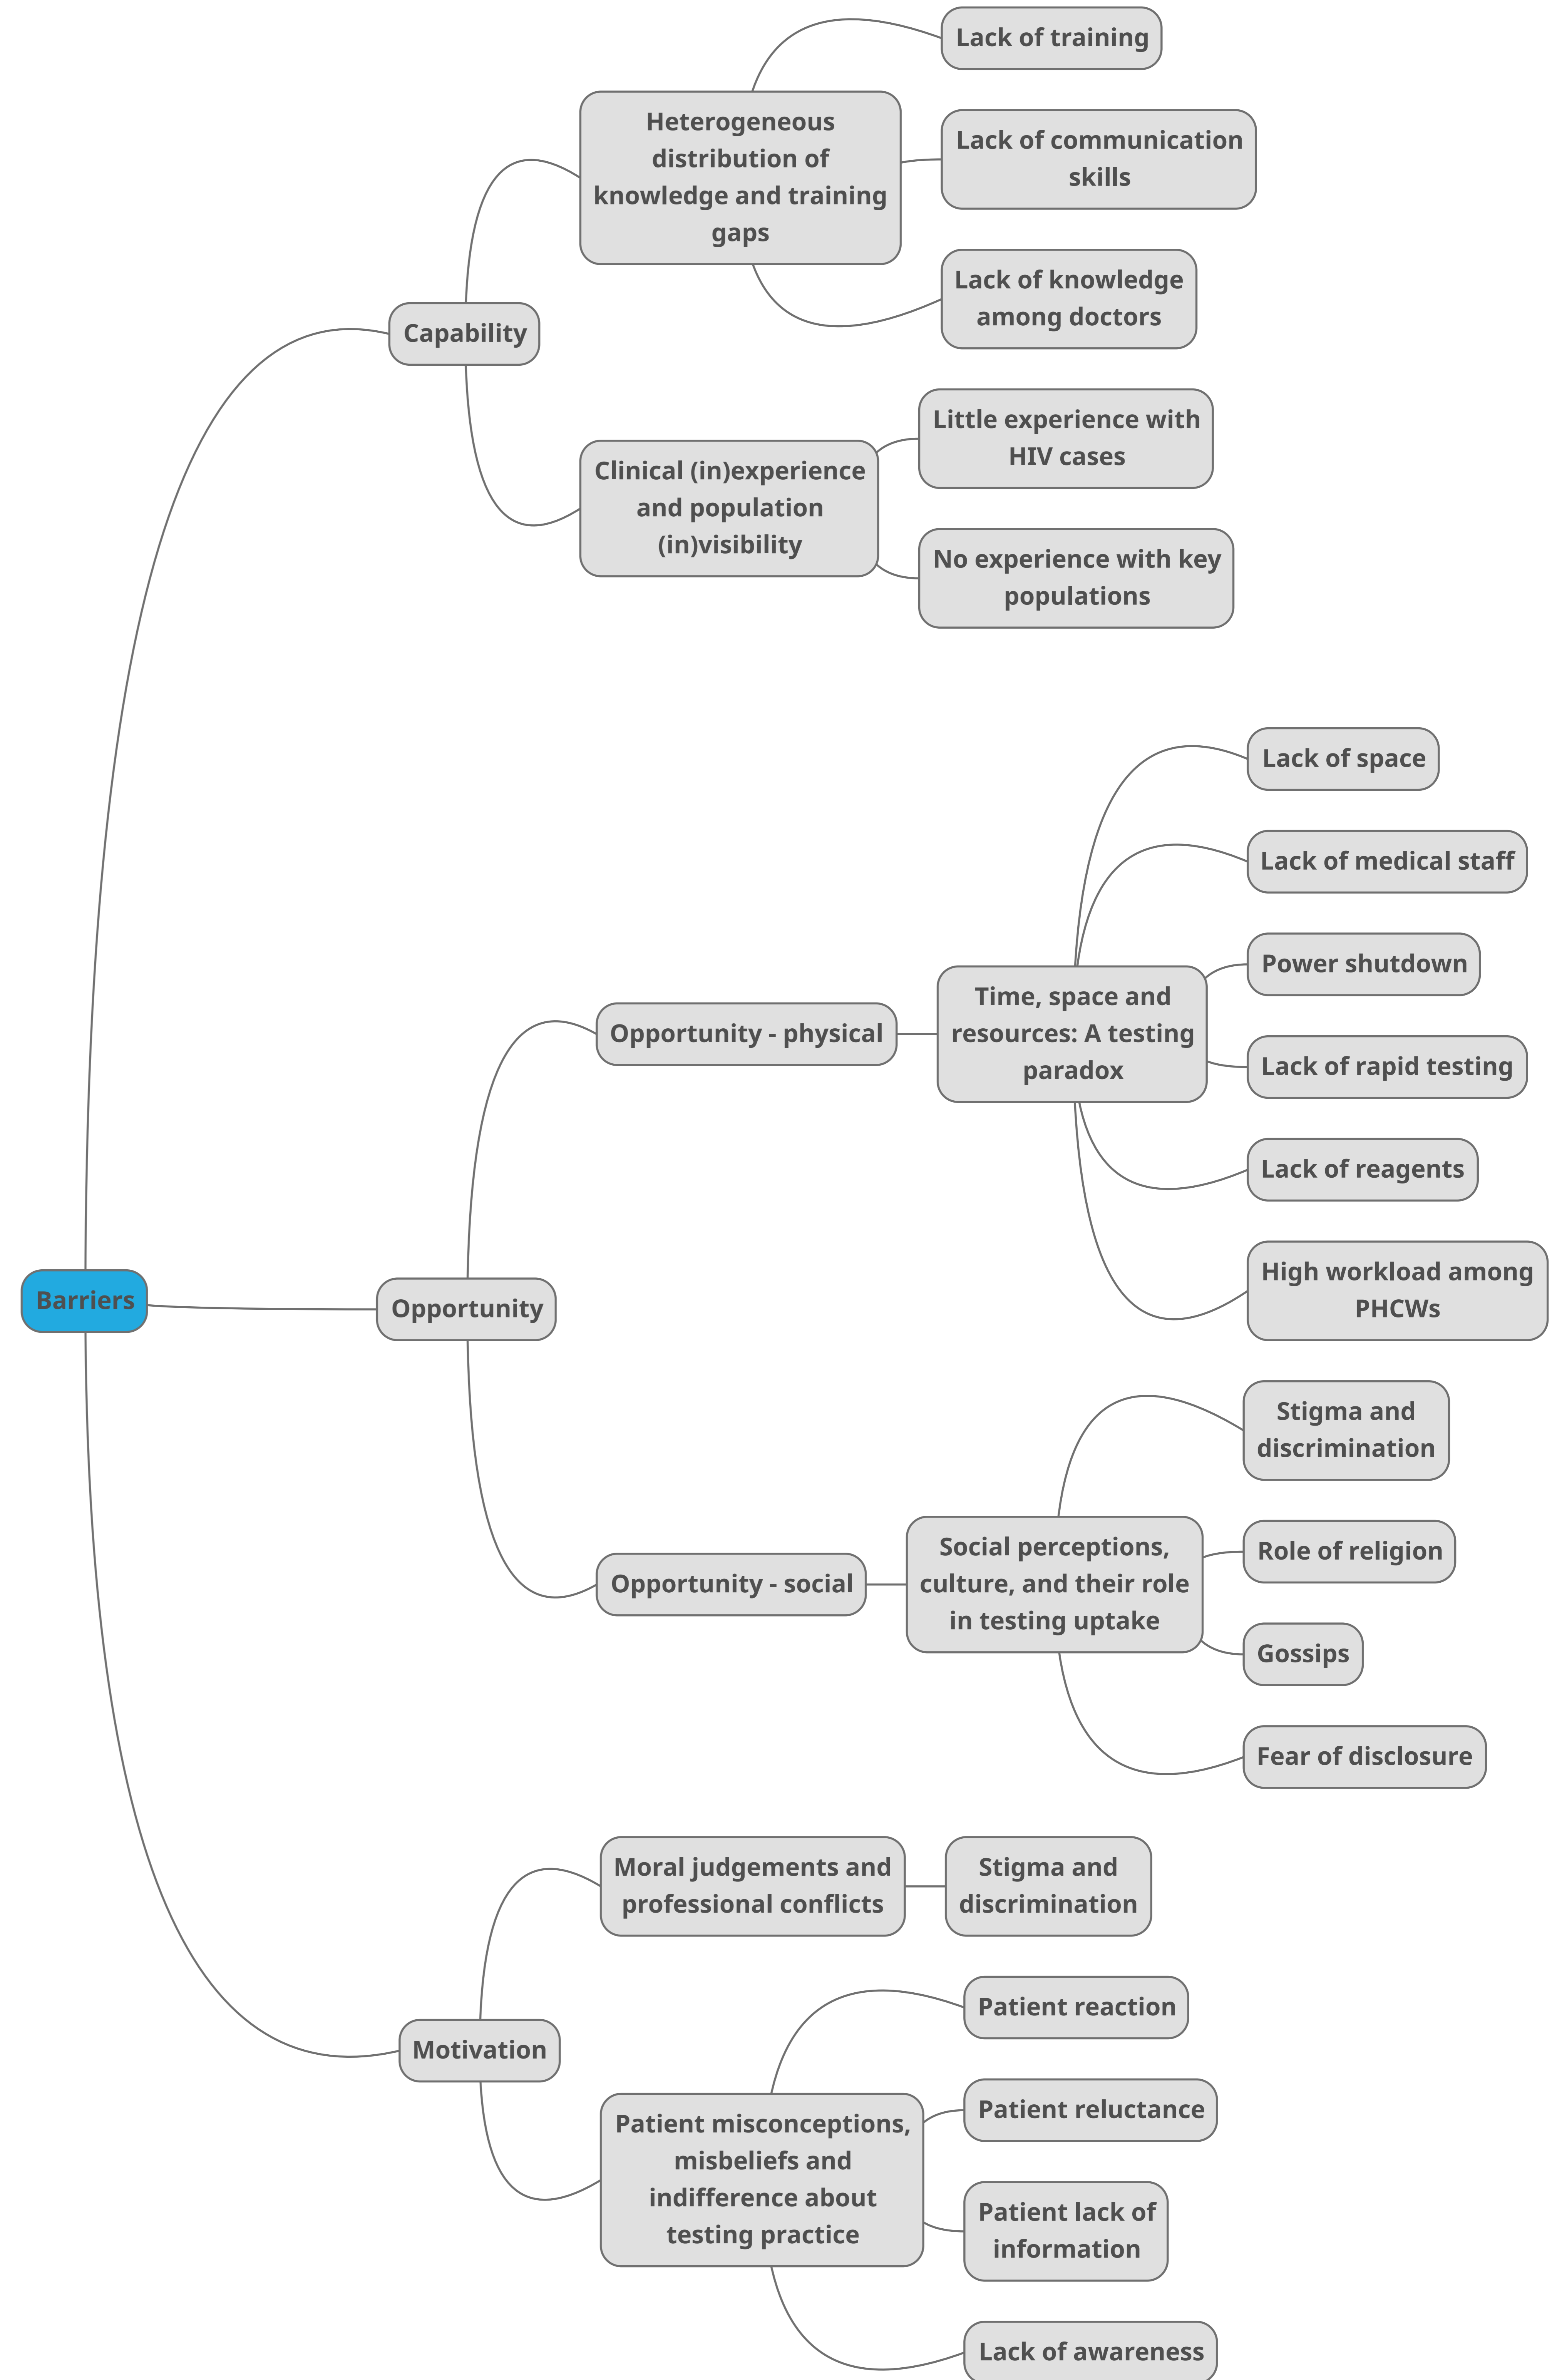

Source: https://storage.googleapis.com/plos-corpus-prod/10.1371/journal.pone.0336257/1/pone.0336257.s003.pdf
